# Supplementary material for: Anti-inflammatory Activity and Phytochemical Profile of Galinsoga Parviflora Cav
Source: MDPI journal article supplement (doi:10.3390/molecules23092133), 2018-08-24
Supplement: s1 [file s1]

## Supplementary Materials

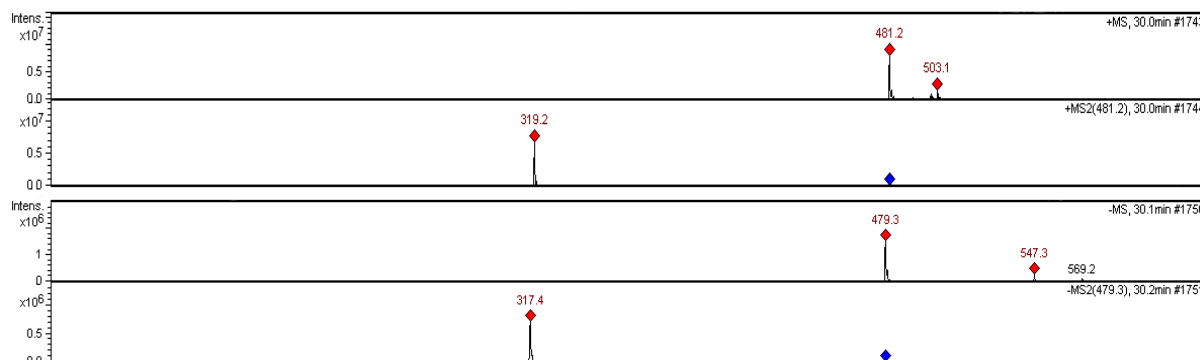

Figure S1. Mass spectrum of compound 1.

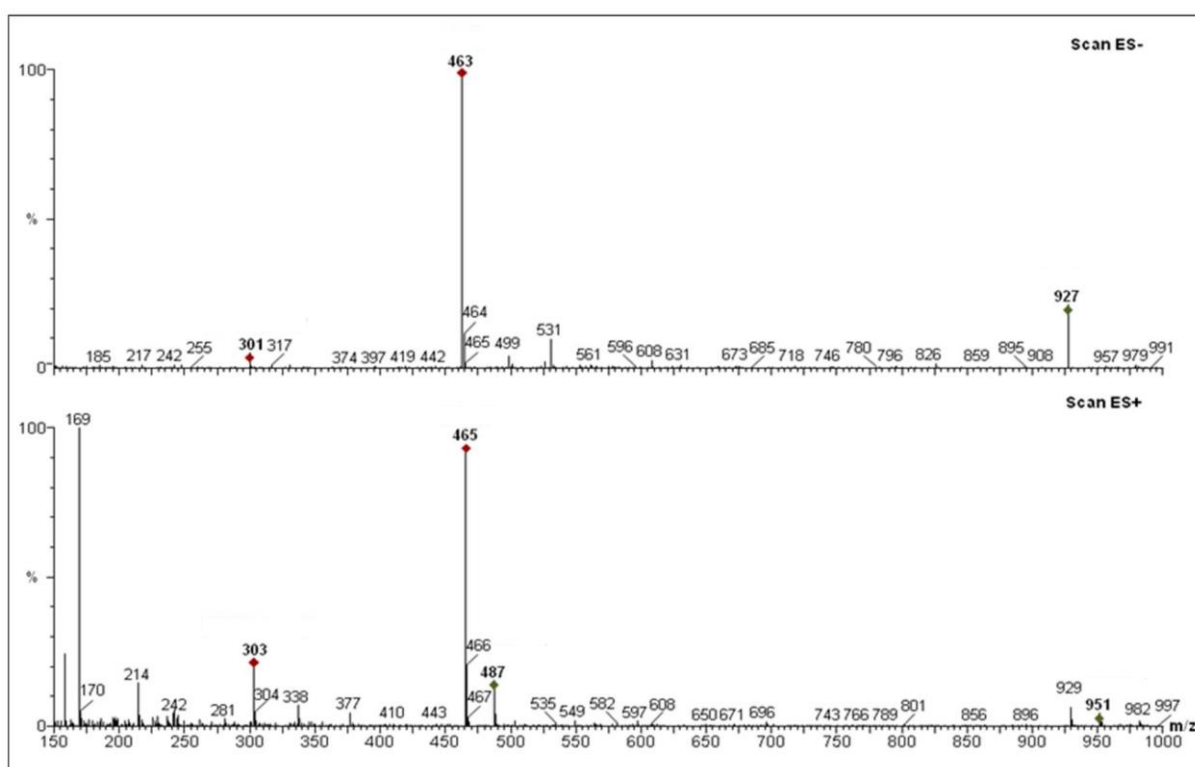

Figure S2. Mass spectrum of compound 2.

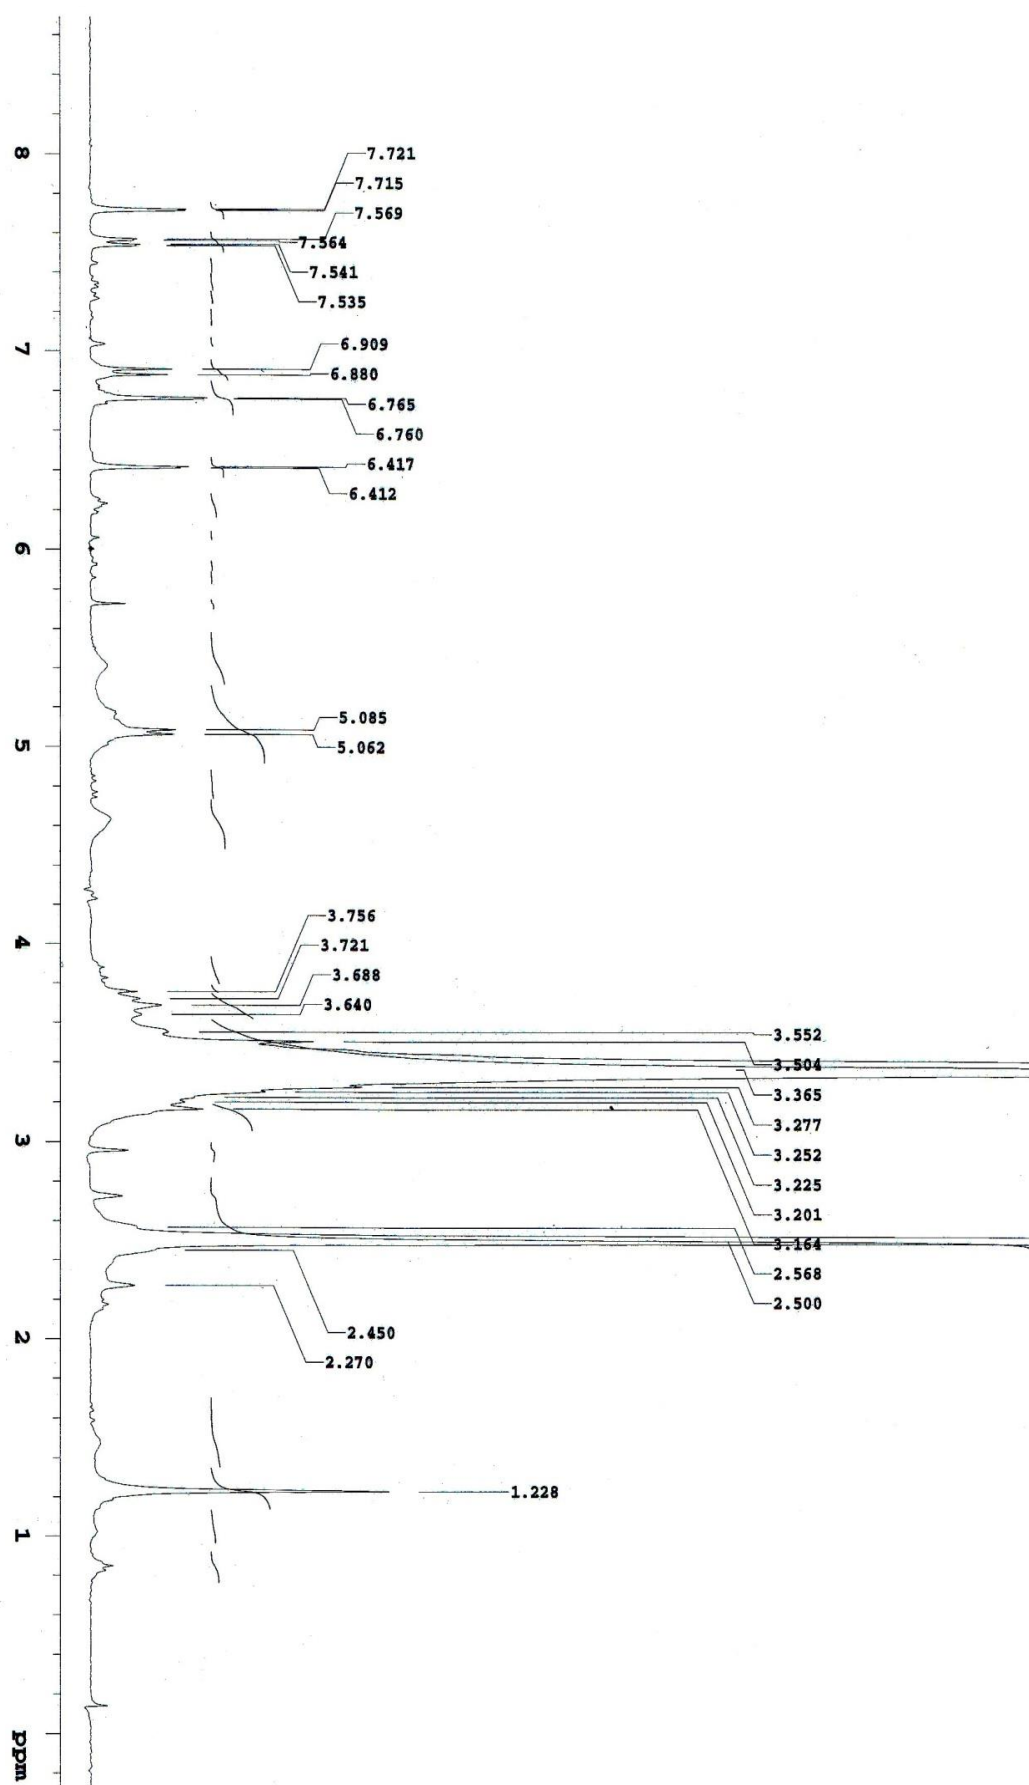

Figure S3.  $^1\text{H}$  NMR spectrum of compound 2.

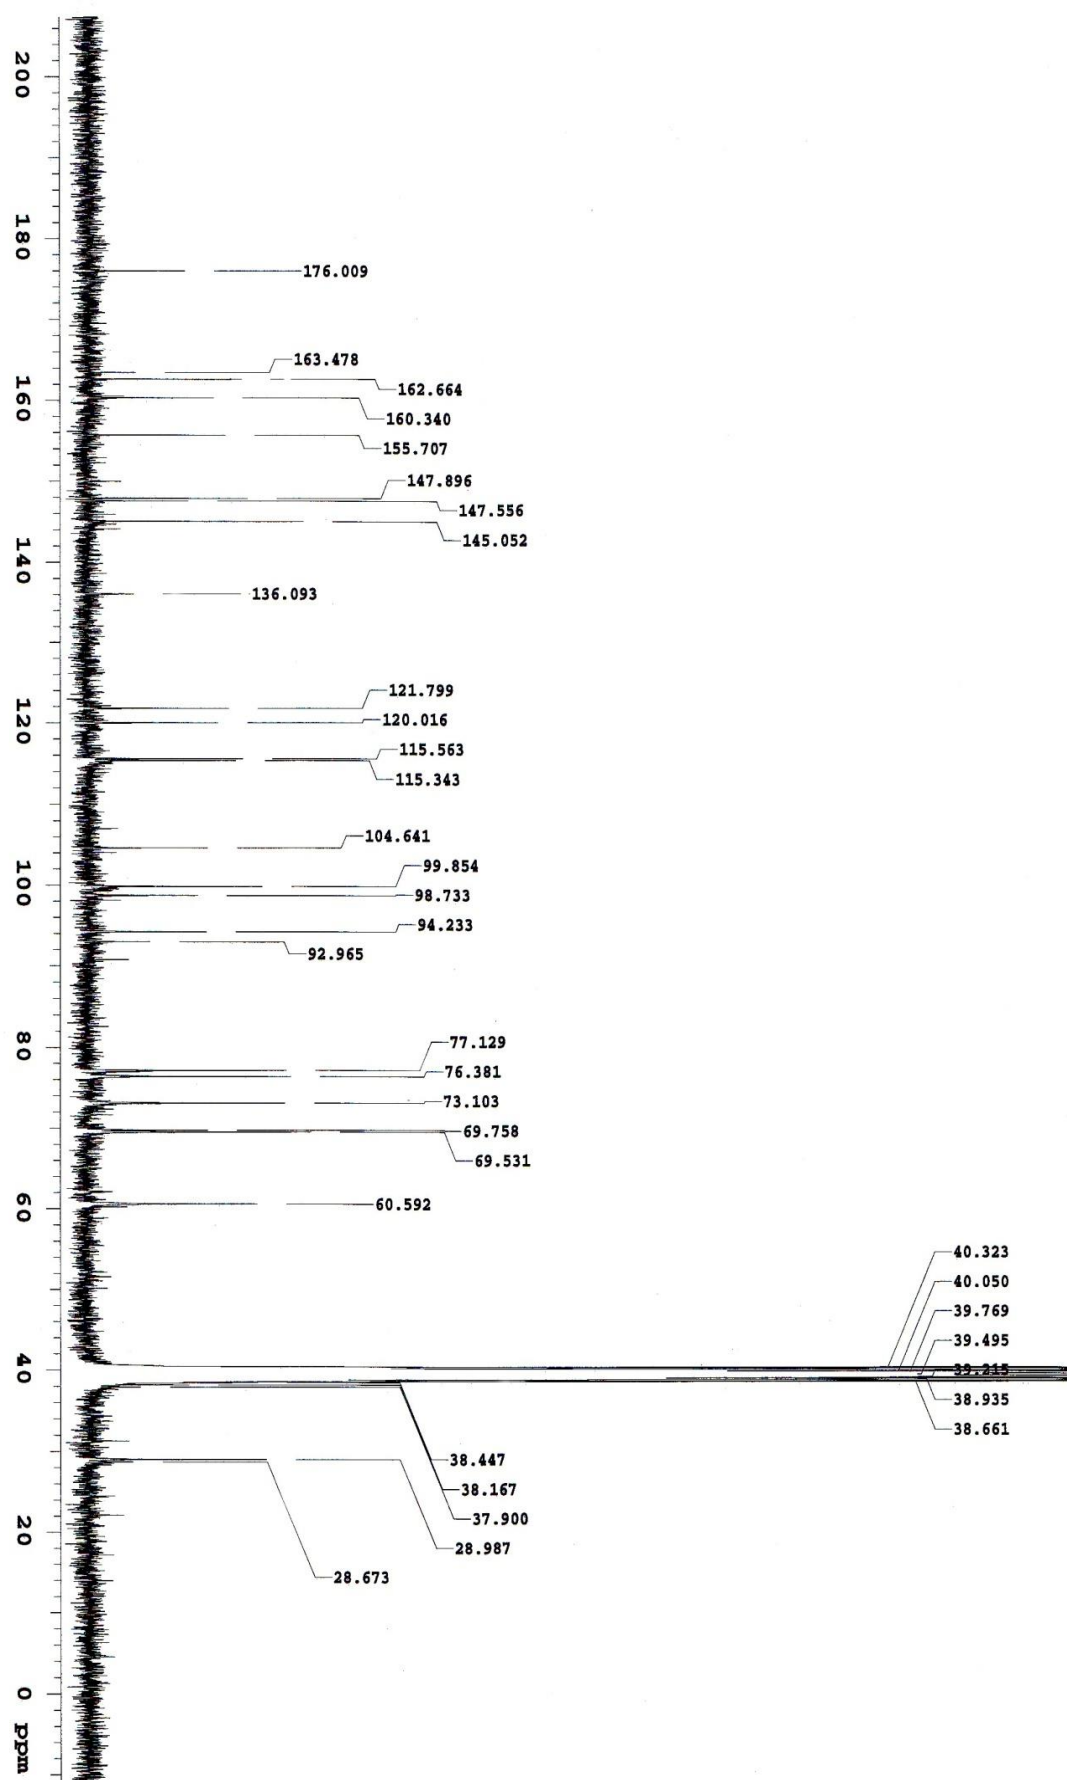

Figure S4. <sup>13</sup>C NMR spectrum of compound 2.

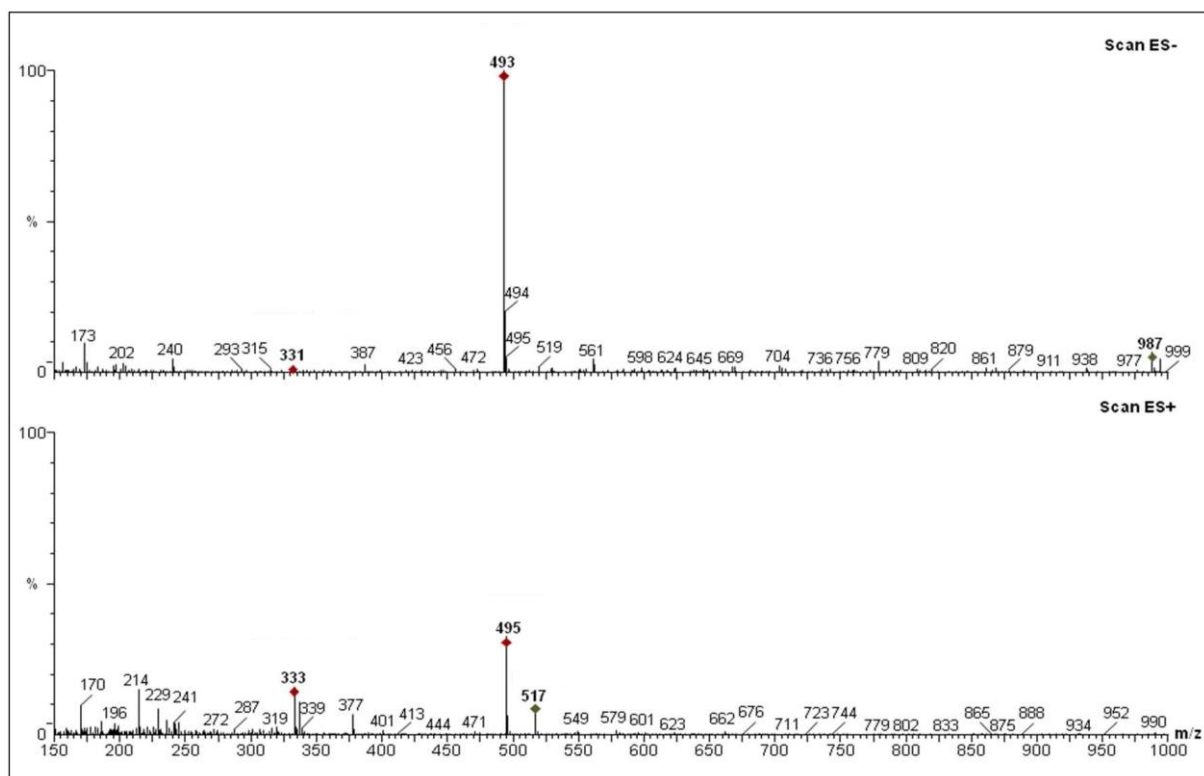

Figure S5. Mass spectrum of compound 3.

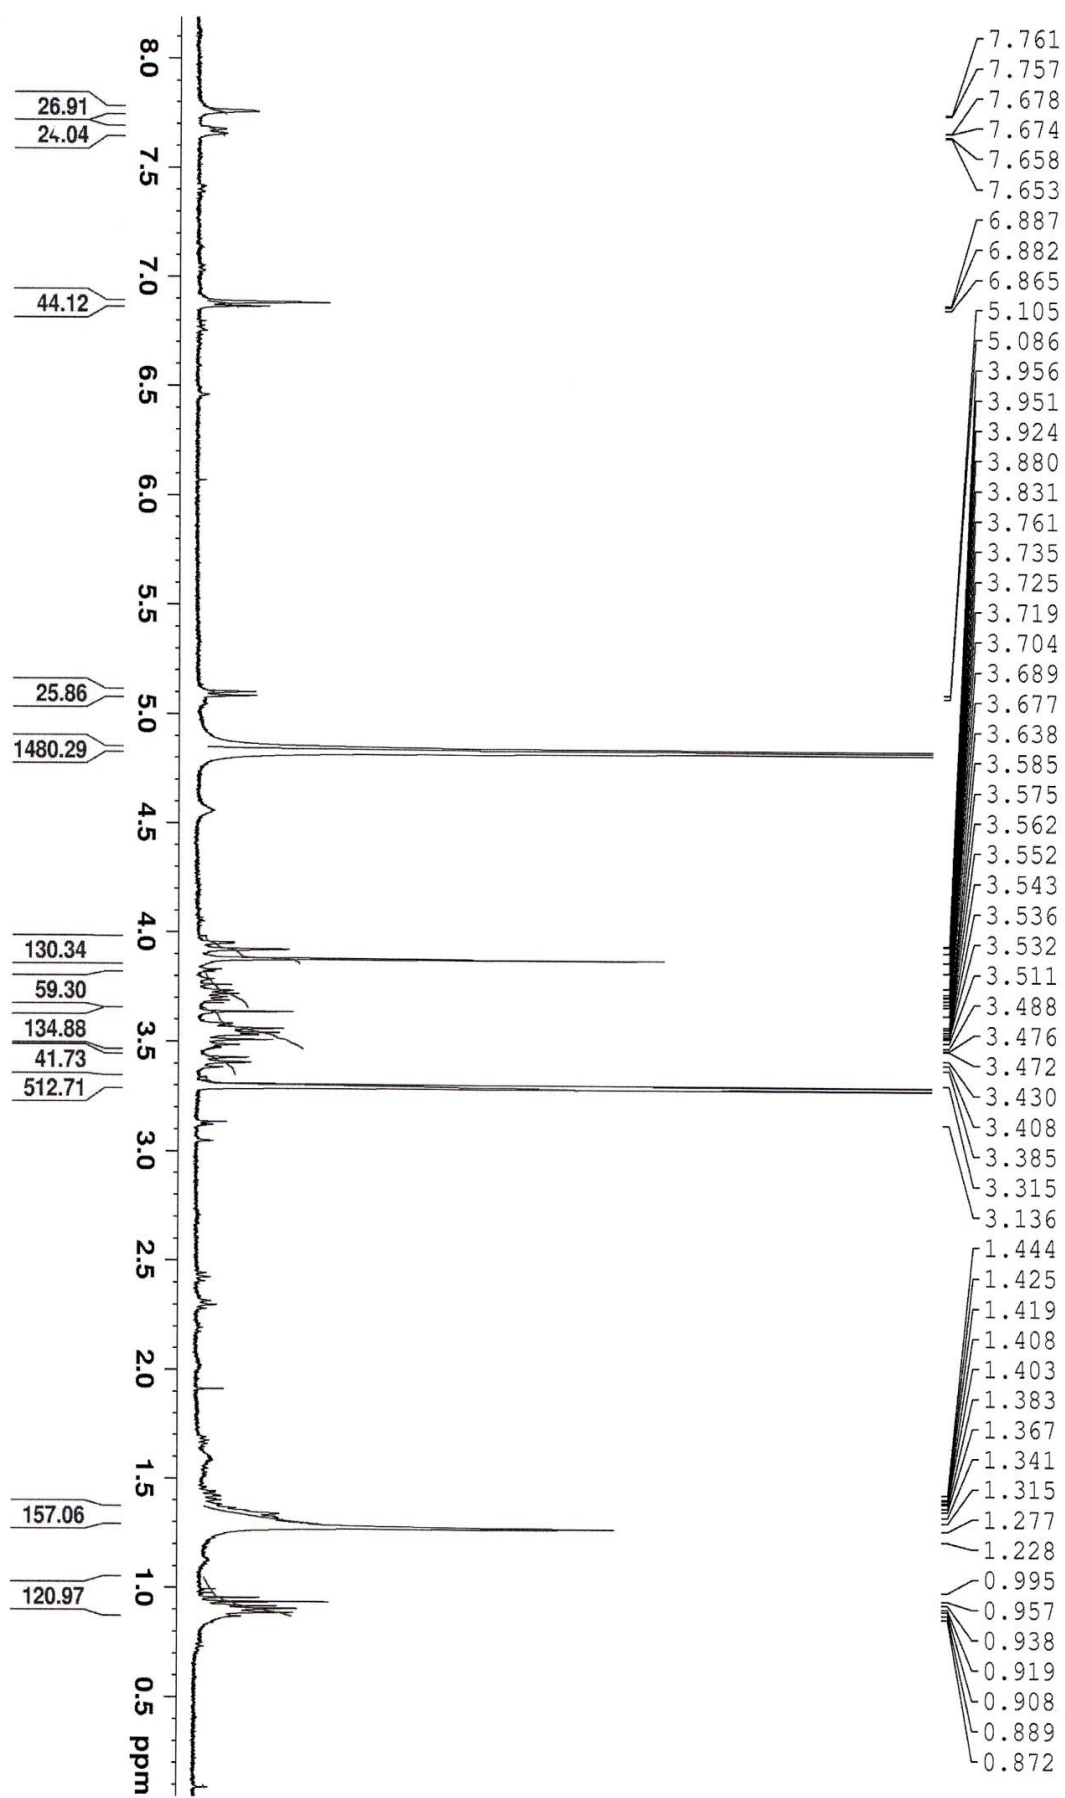

Figure S6. <sup>1</sup>H NMR spectrum of compound 3.

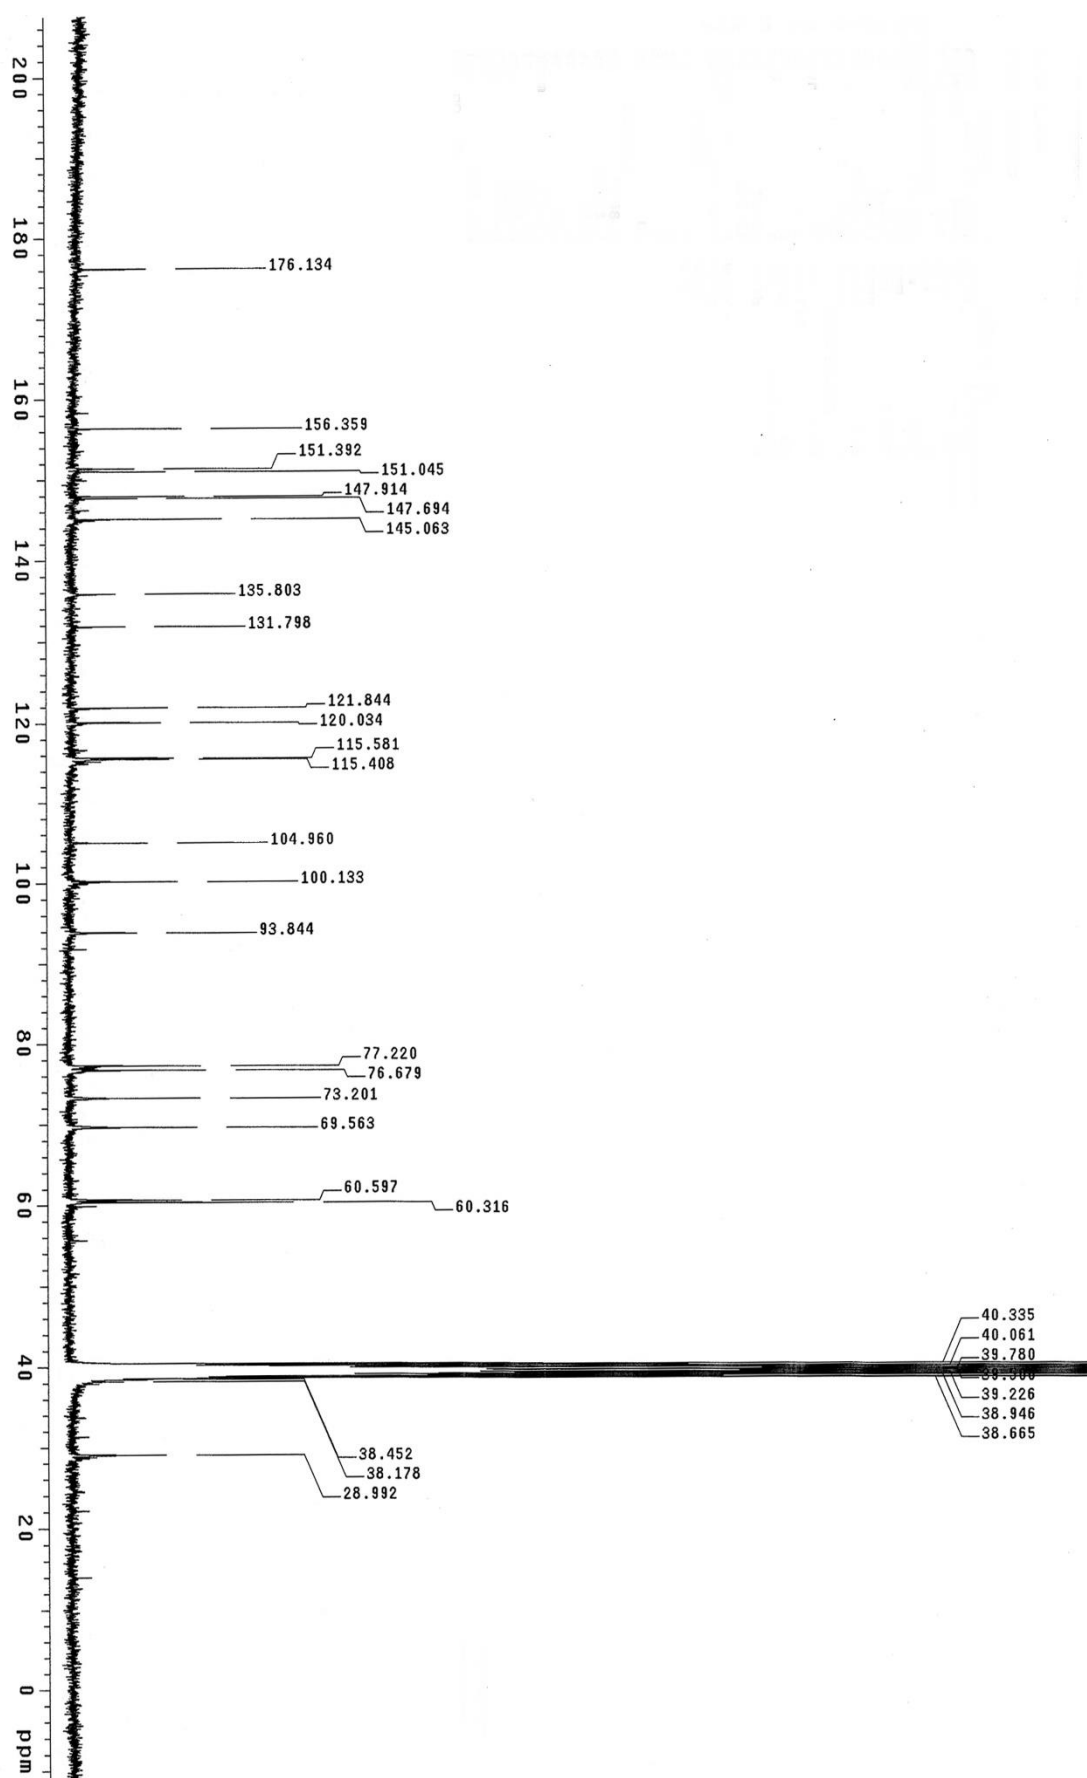

Figure S7.  $^{13}\text{C}$  NMR spectrum of compound 3.

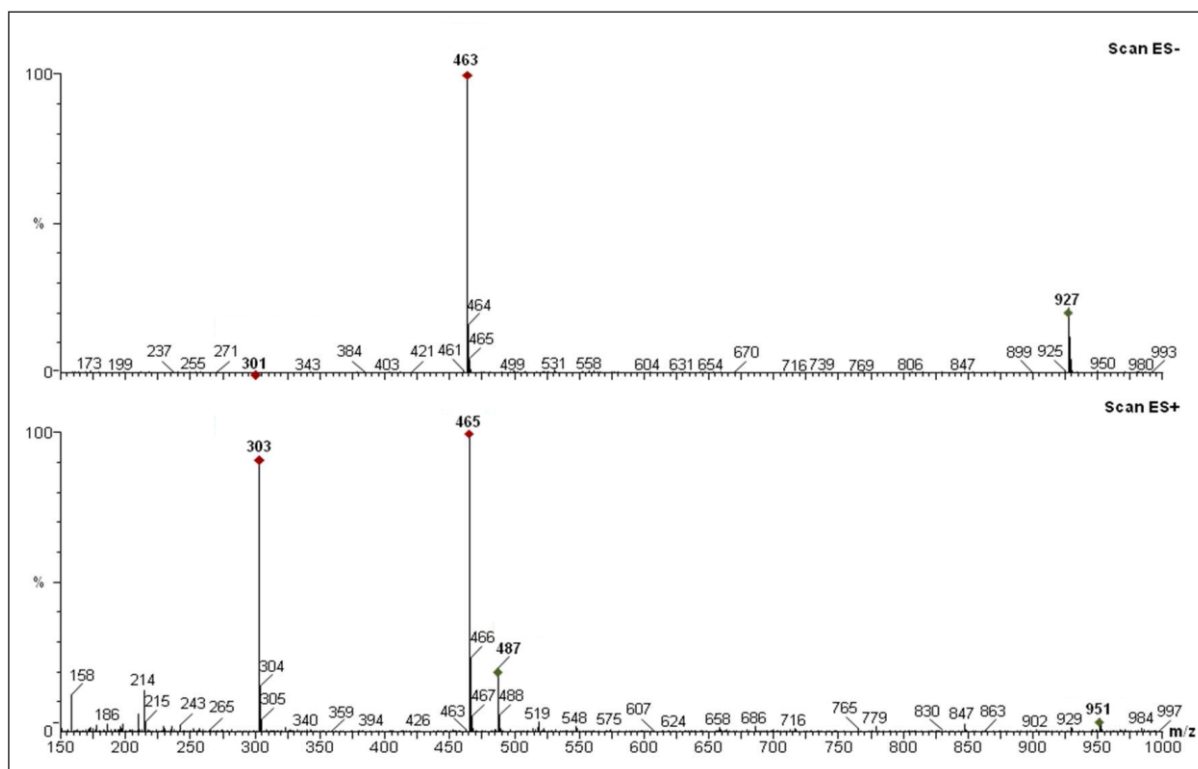

Figure S8. Mass spectrum of compound 4.

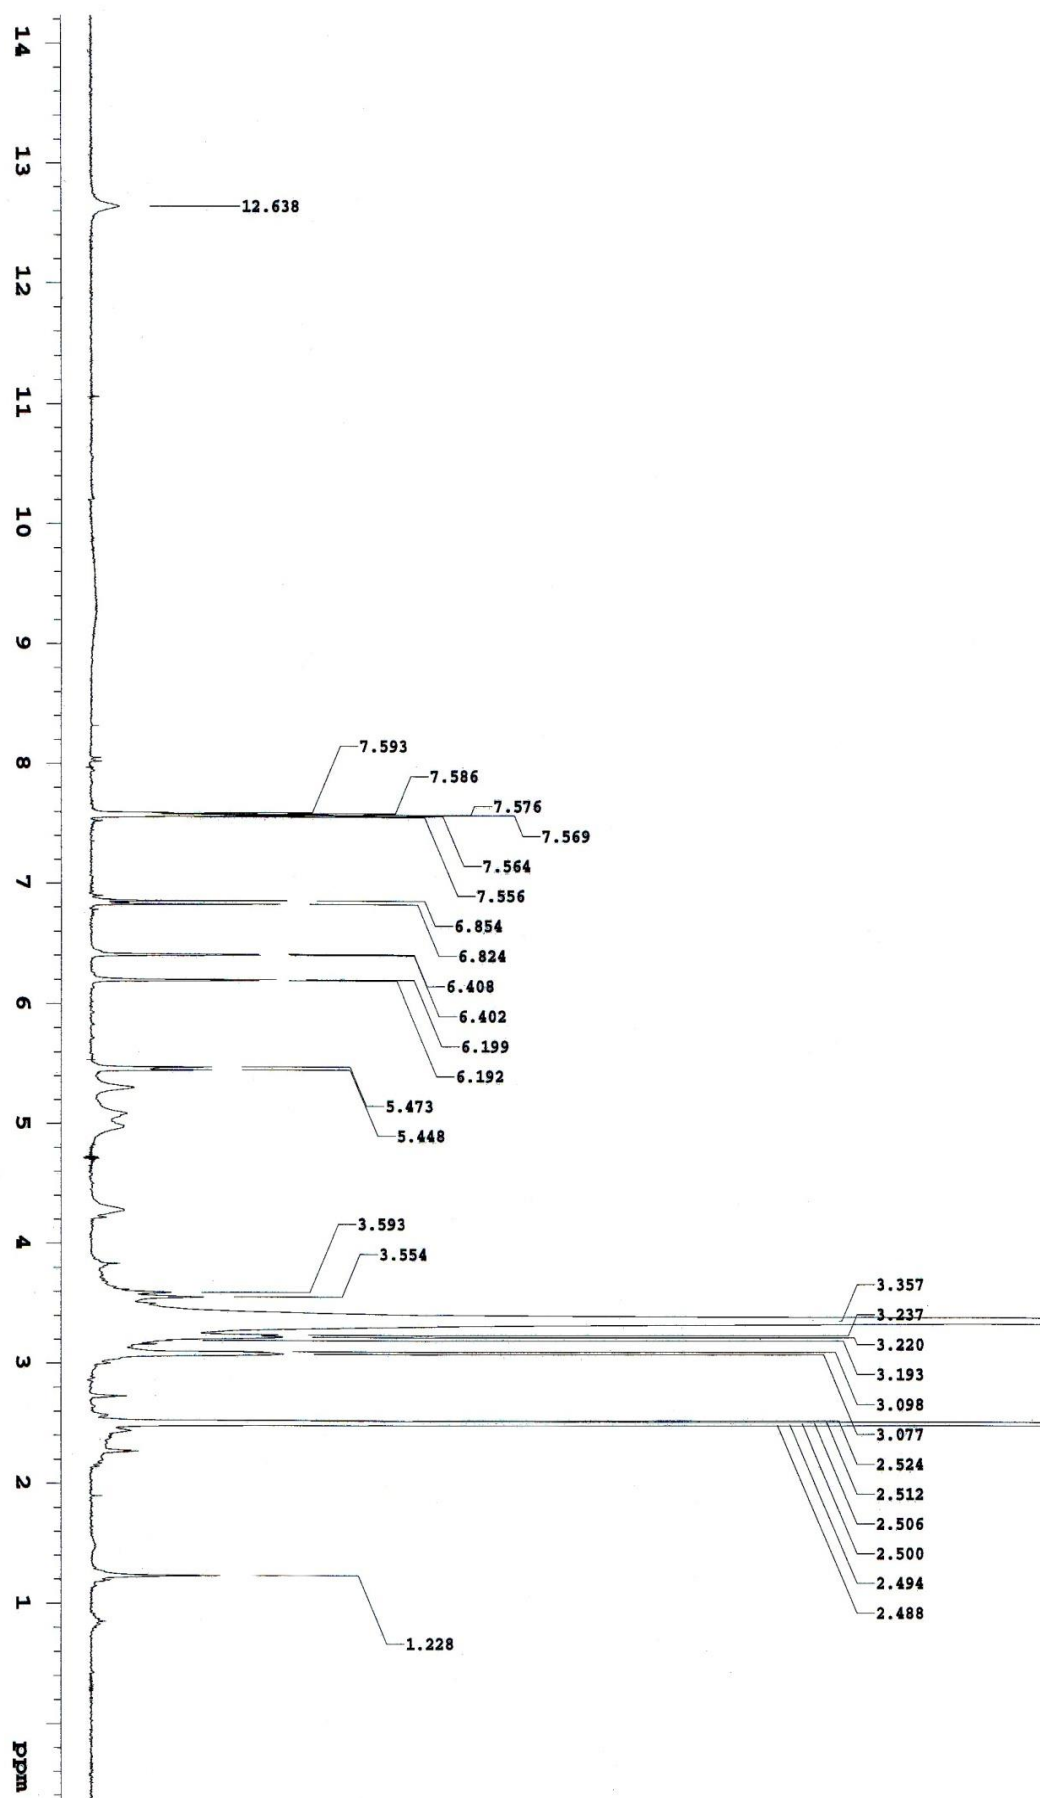

Figure S9.  $^1\text{H}$  NMR spectrum of compound 4.



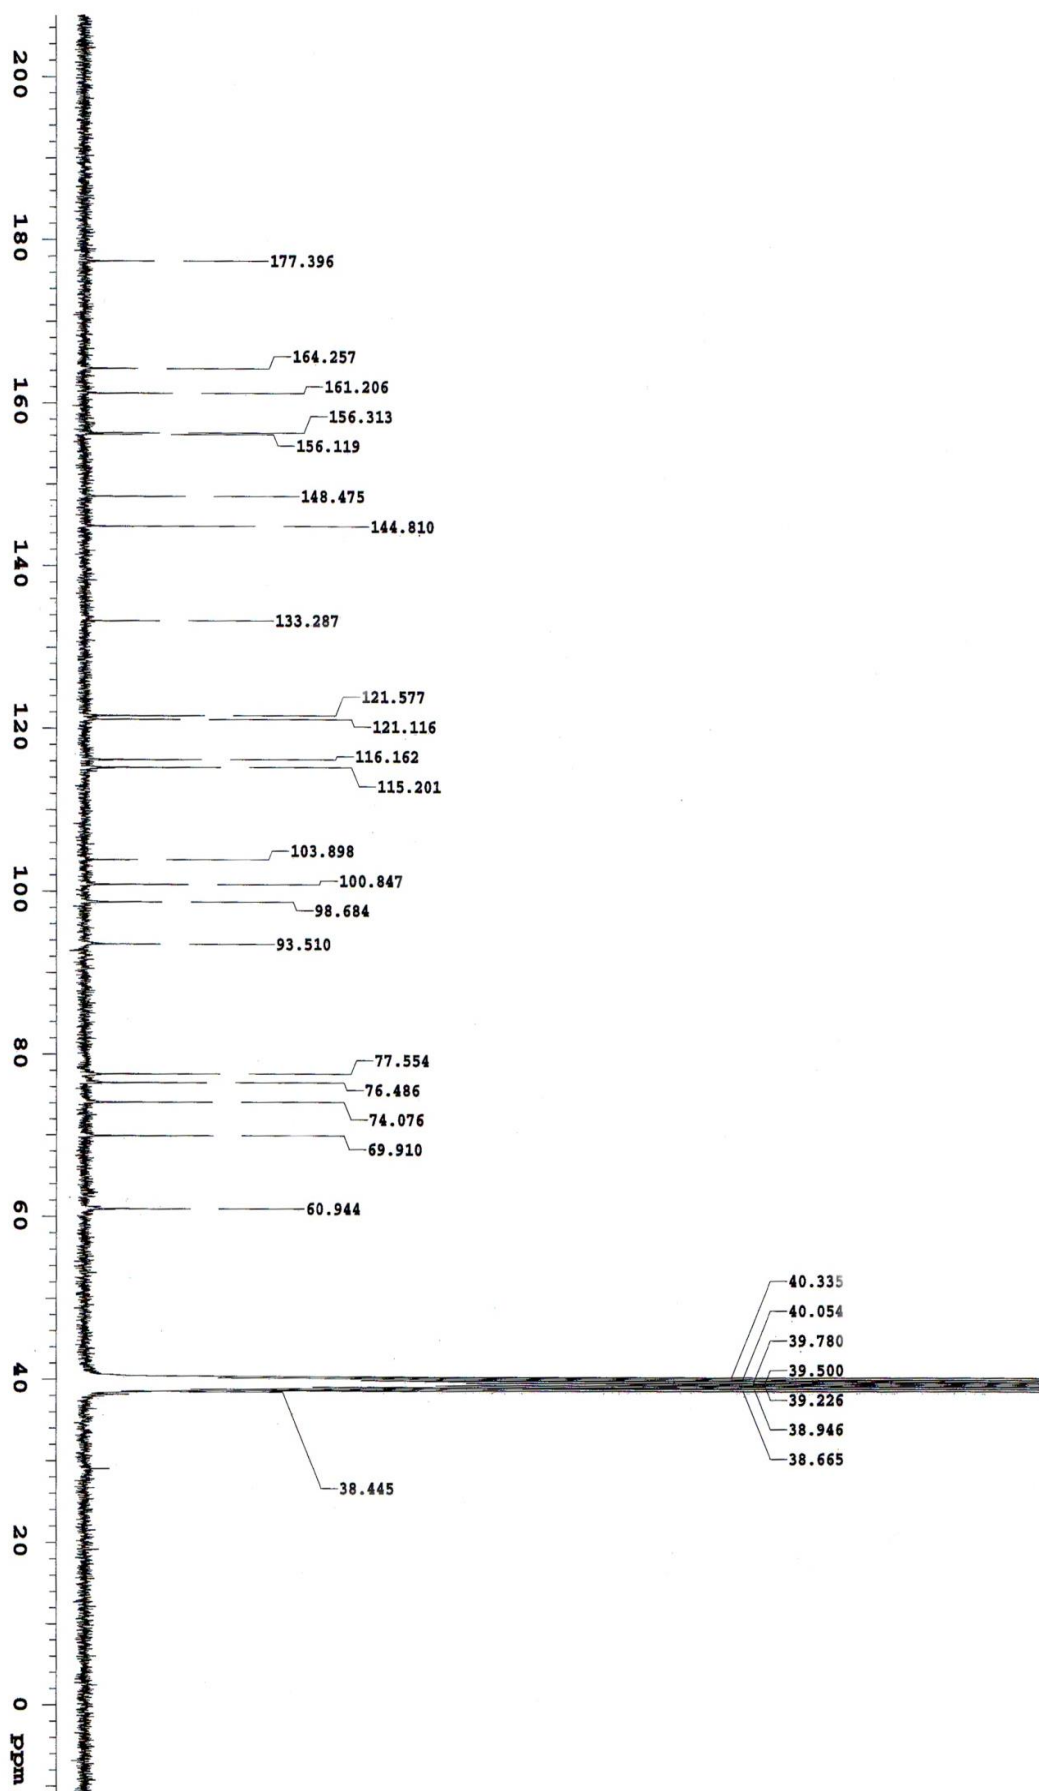

Figure S10.  $^{13}\text{C}$  NMR spectrum of compound 4.

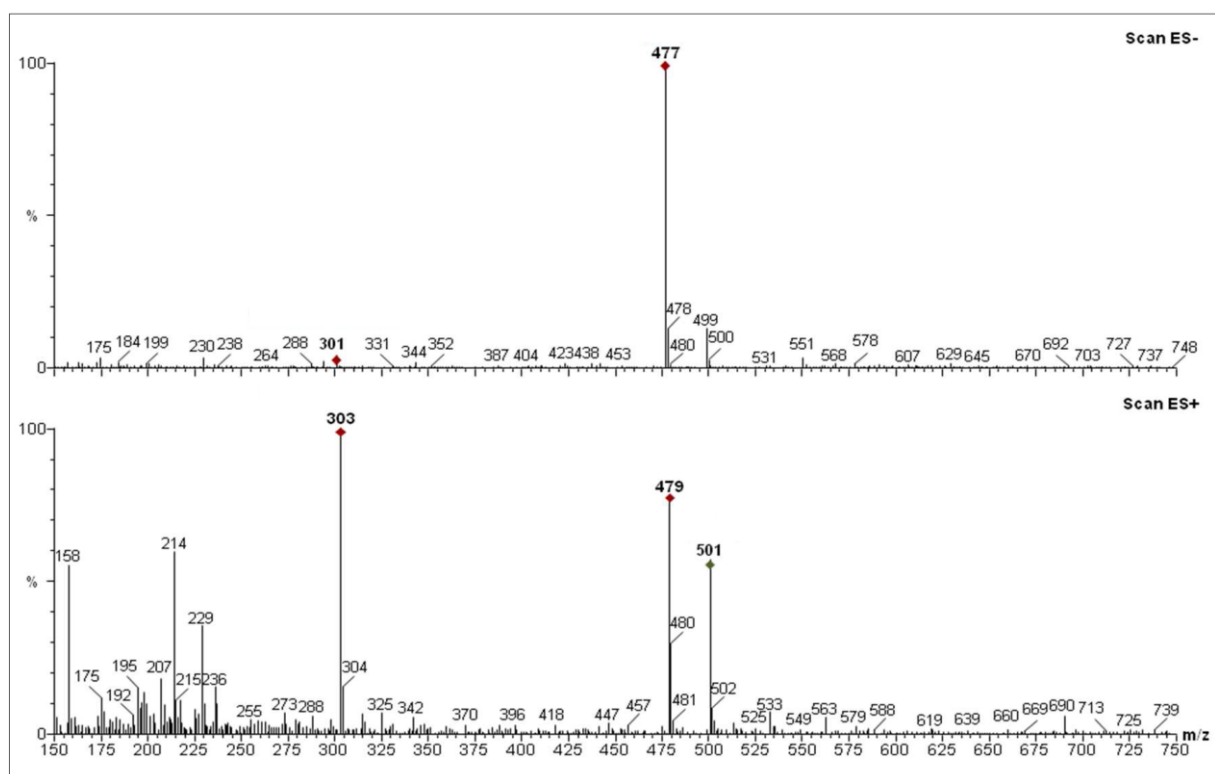

Figure S11. Mass spectrum of **compound 5**.

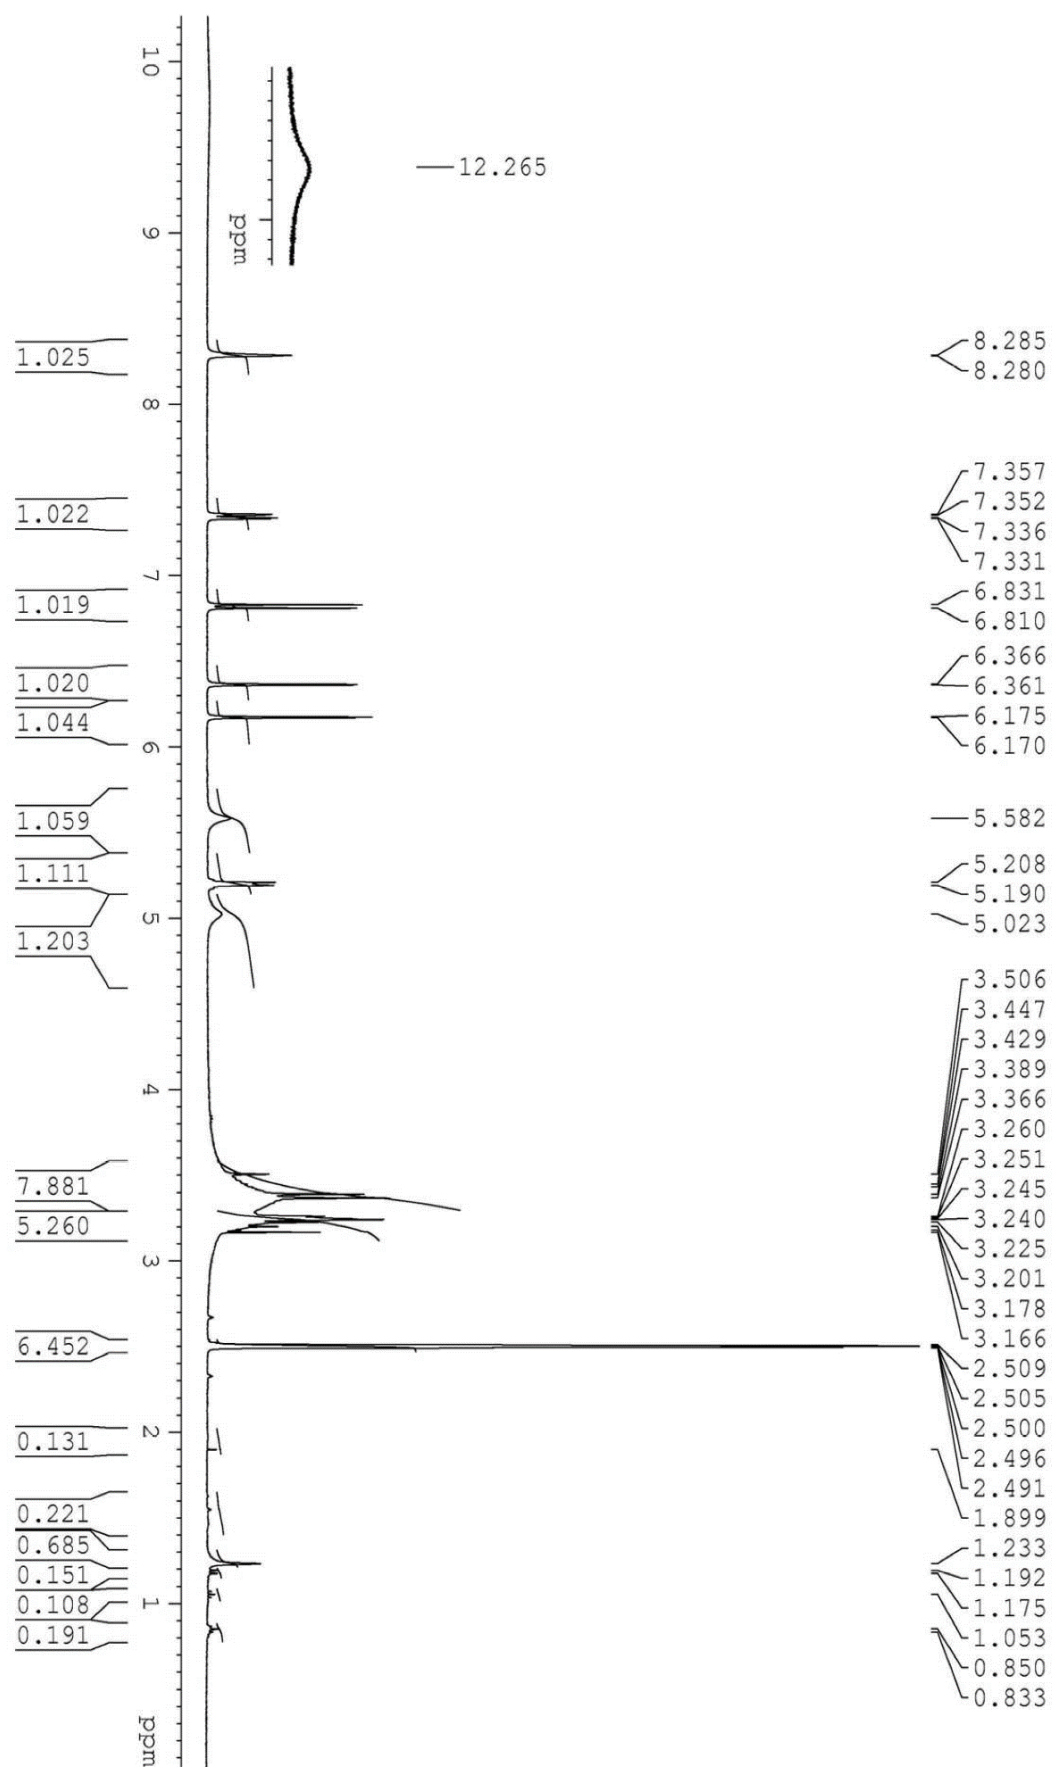

Figure S12. <sup>1</sup>H NMR spectrum of compound 5.

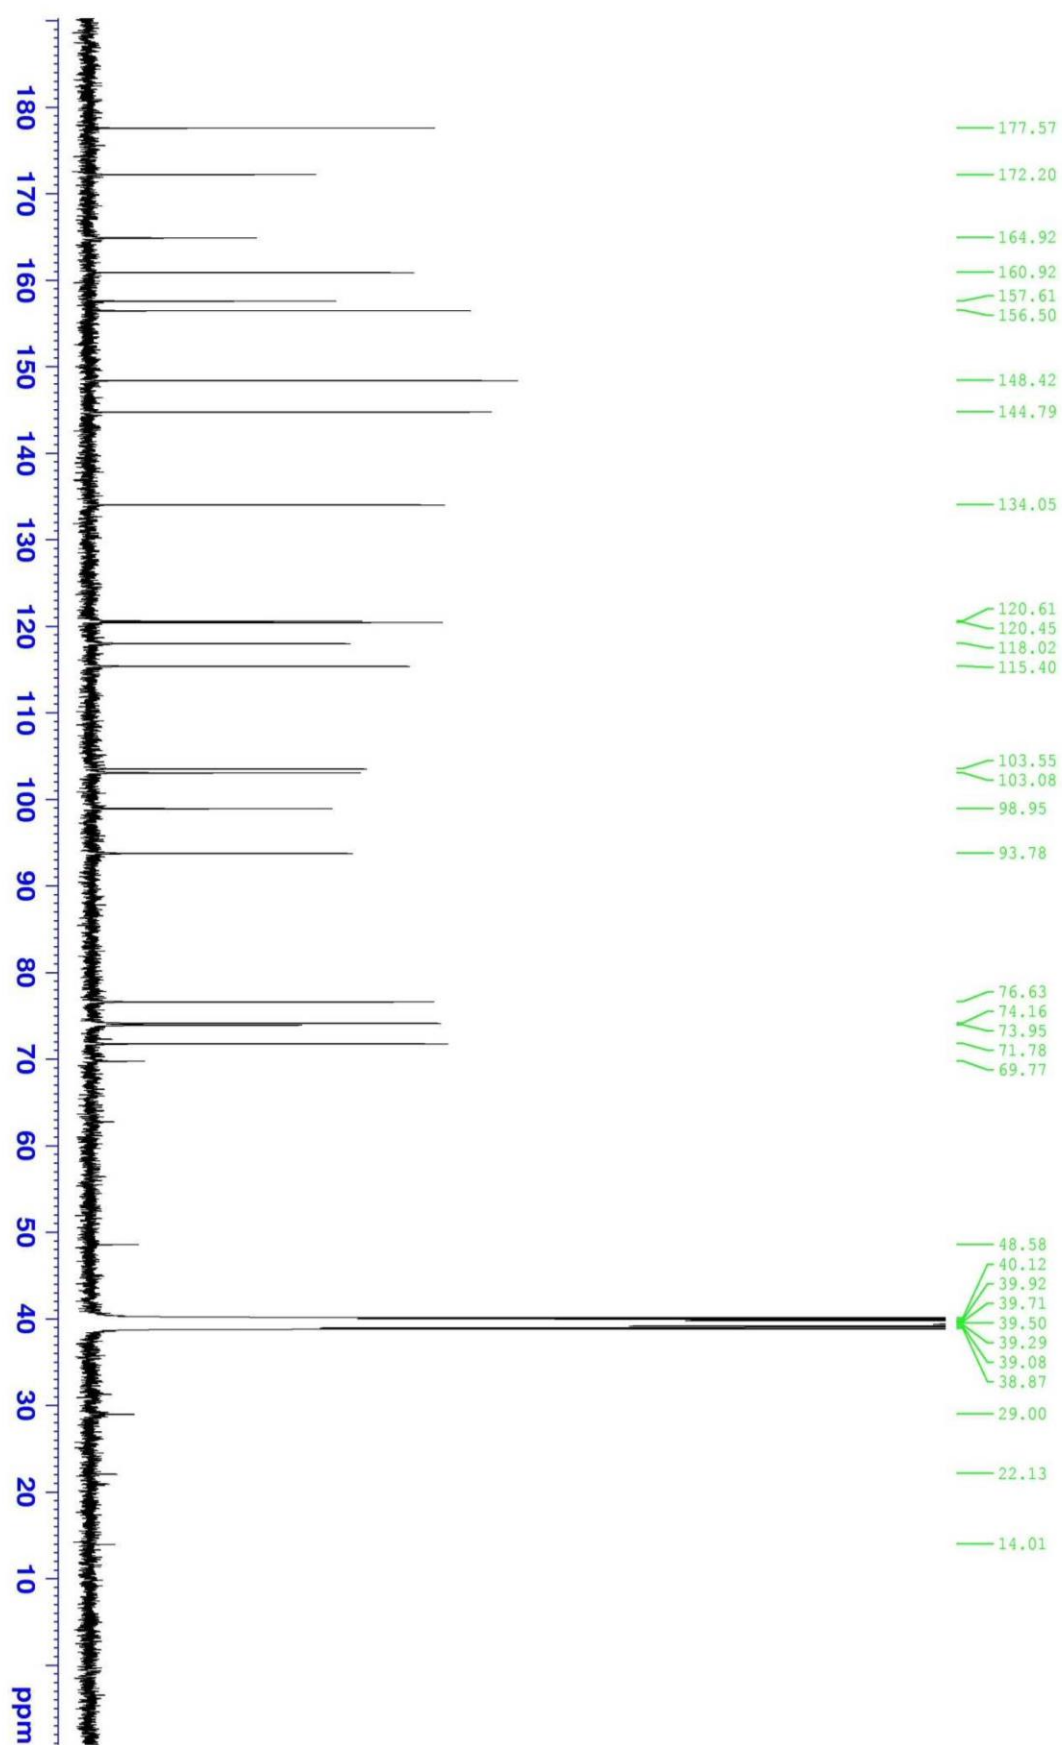

Figure S13. <sup>13</sup>C NMR spectrum of compound 5.

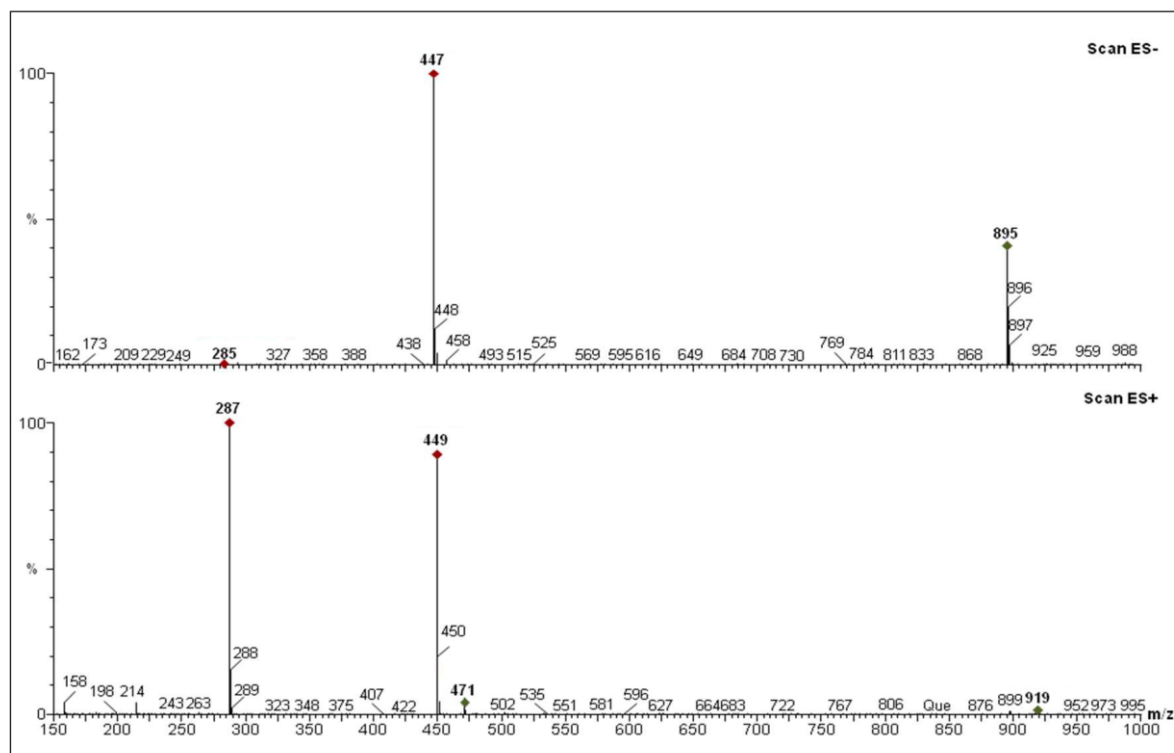

Figure S14. Mass spectrum of compound 6.

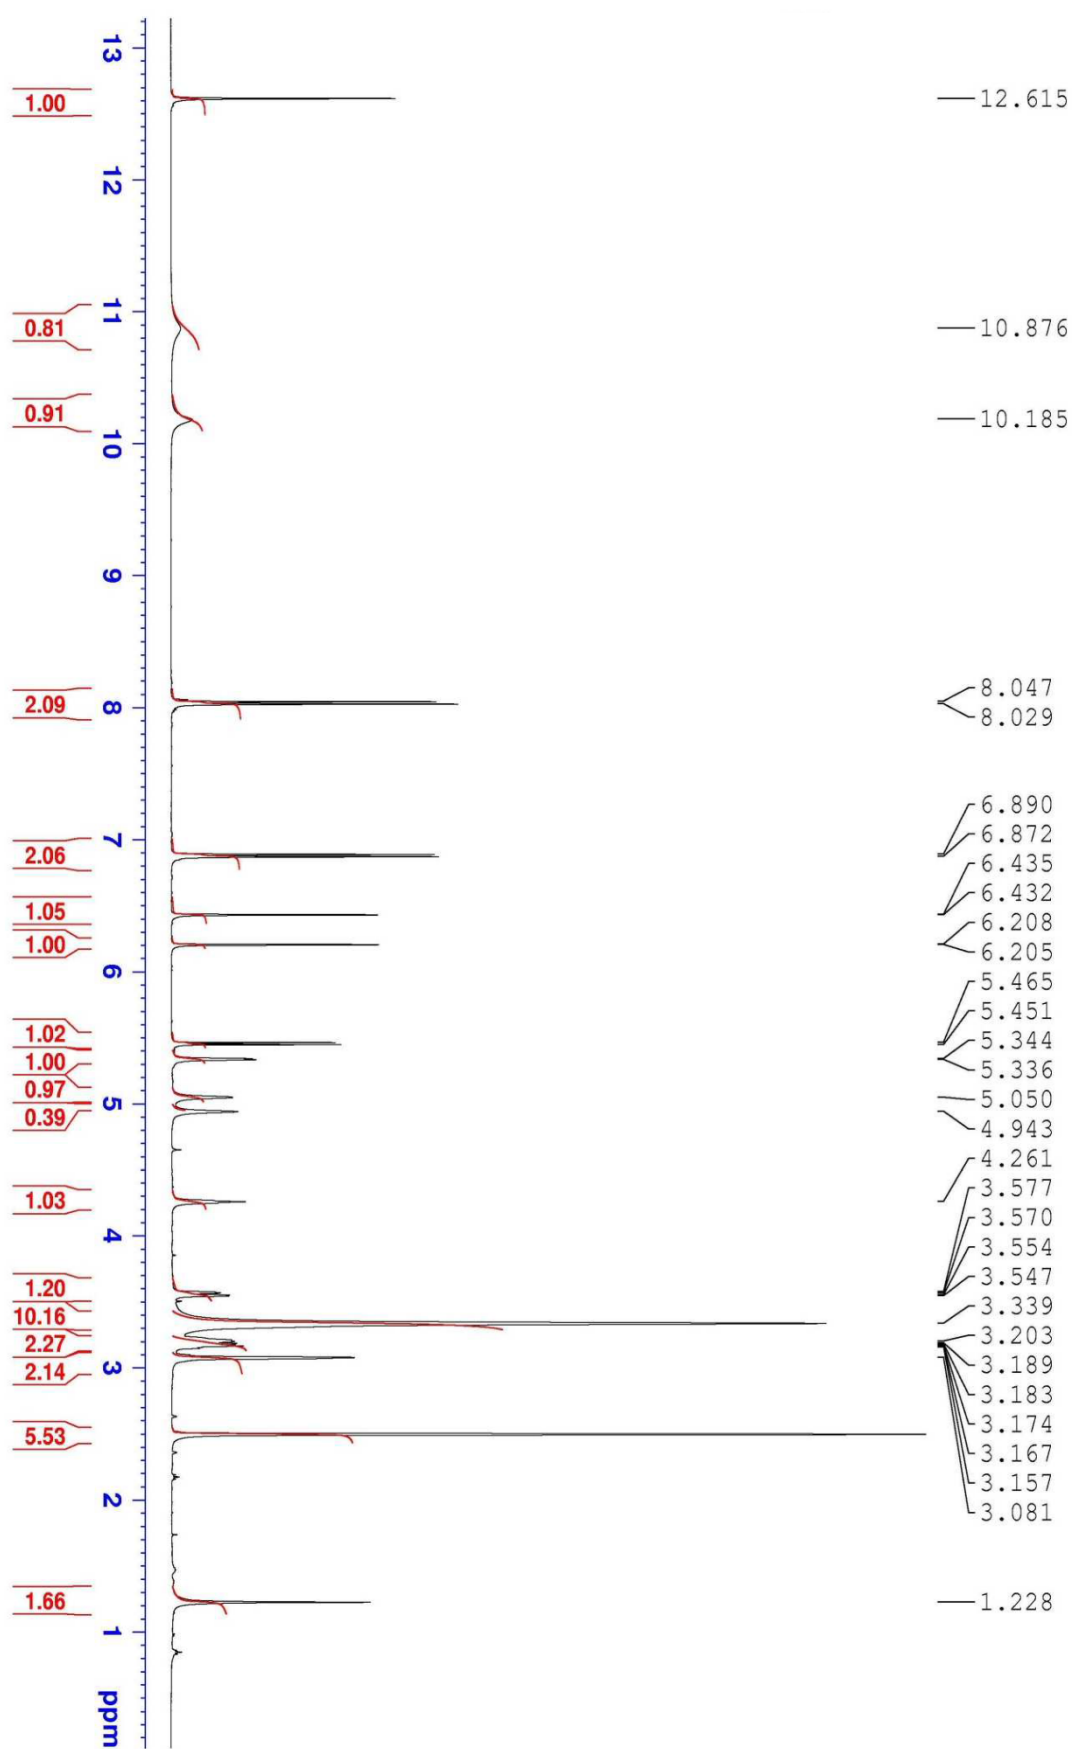

Figure S15. <sup>1</sup>H NMR spectrum of compound 6.

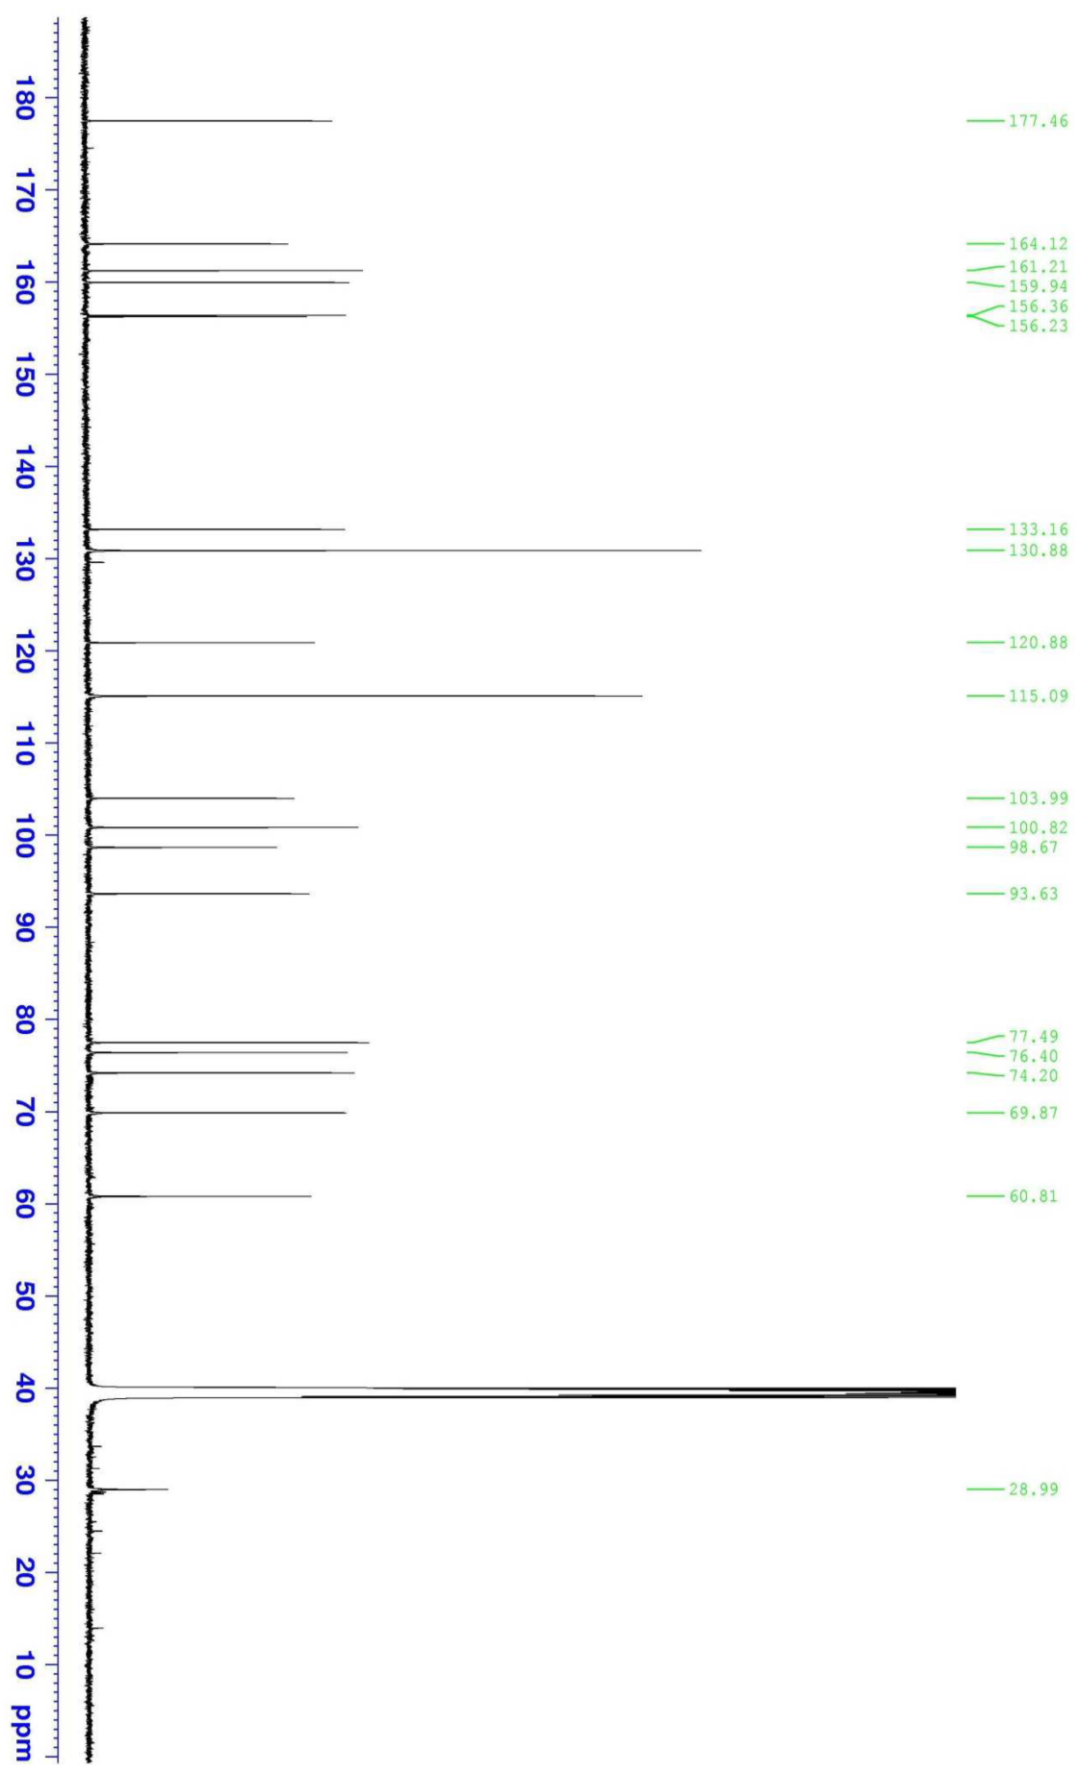

Figure S16. <sup>13</sup>C NMR spectrum of compound 6.

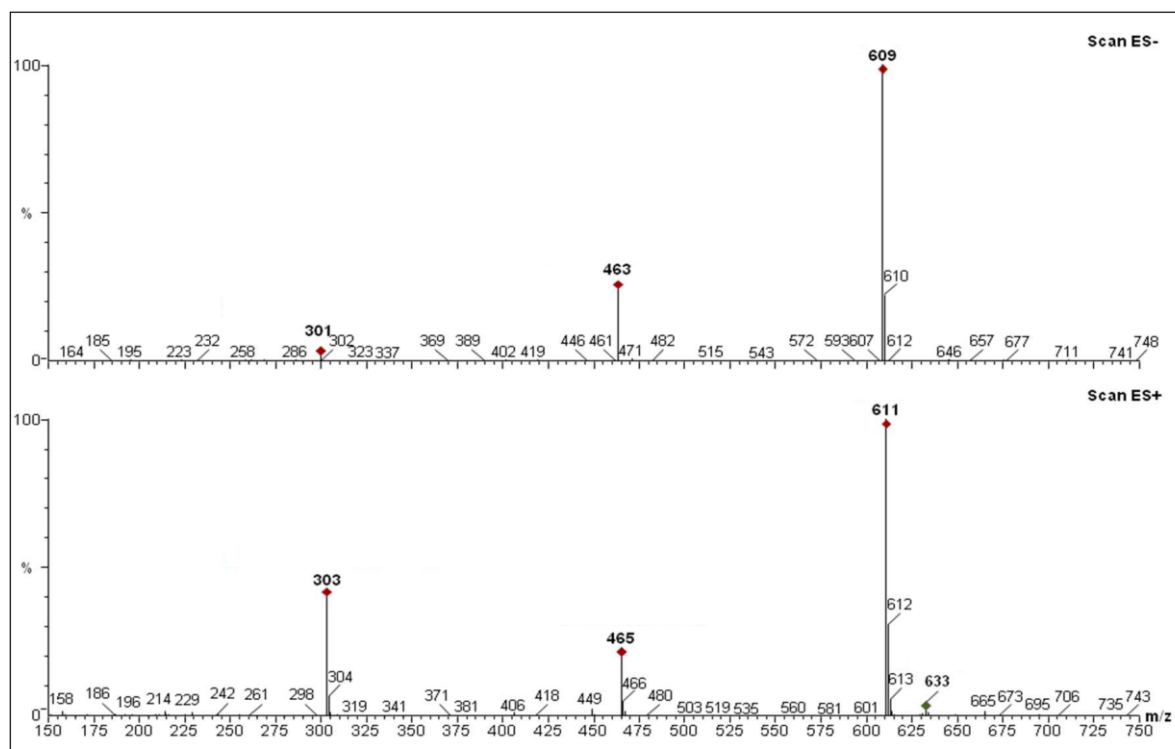

Figure S17. Mass spectrum of compound 7.



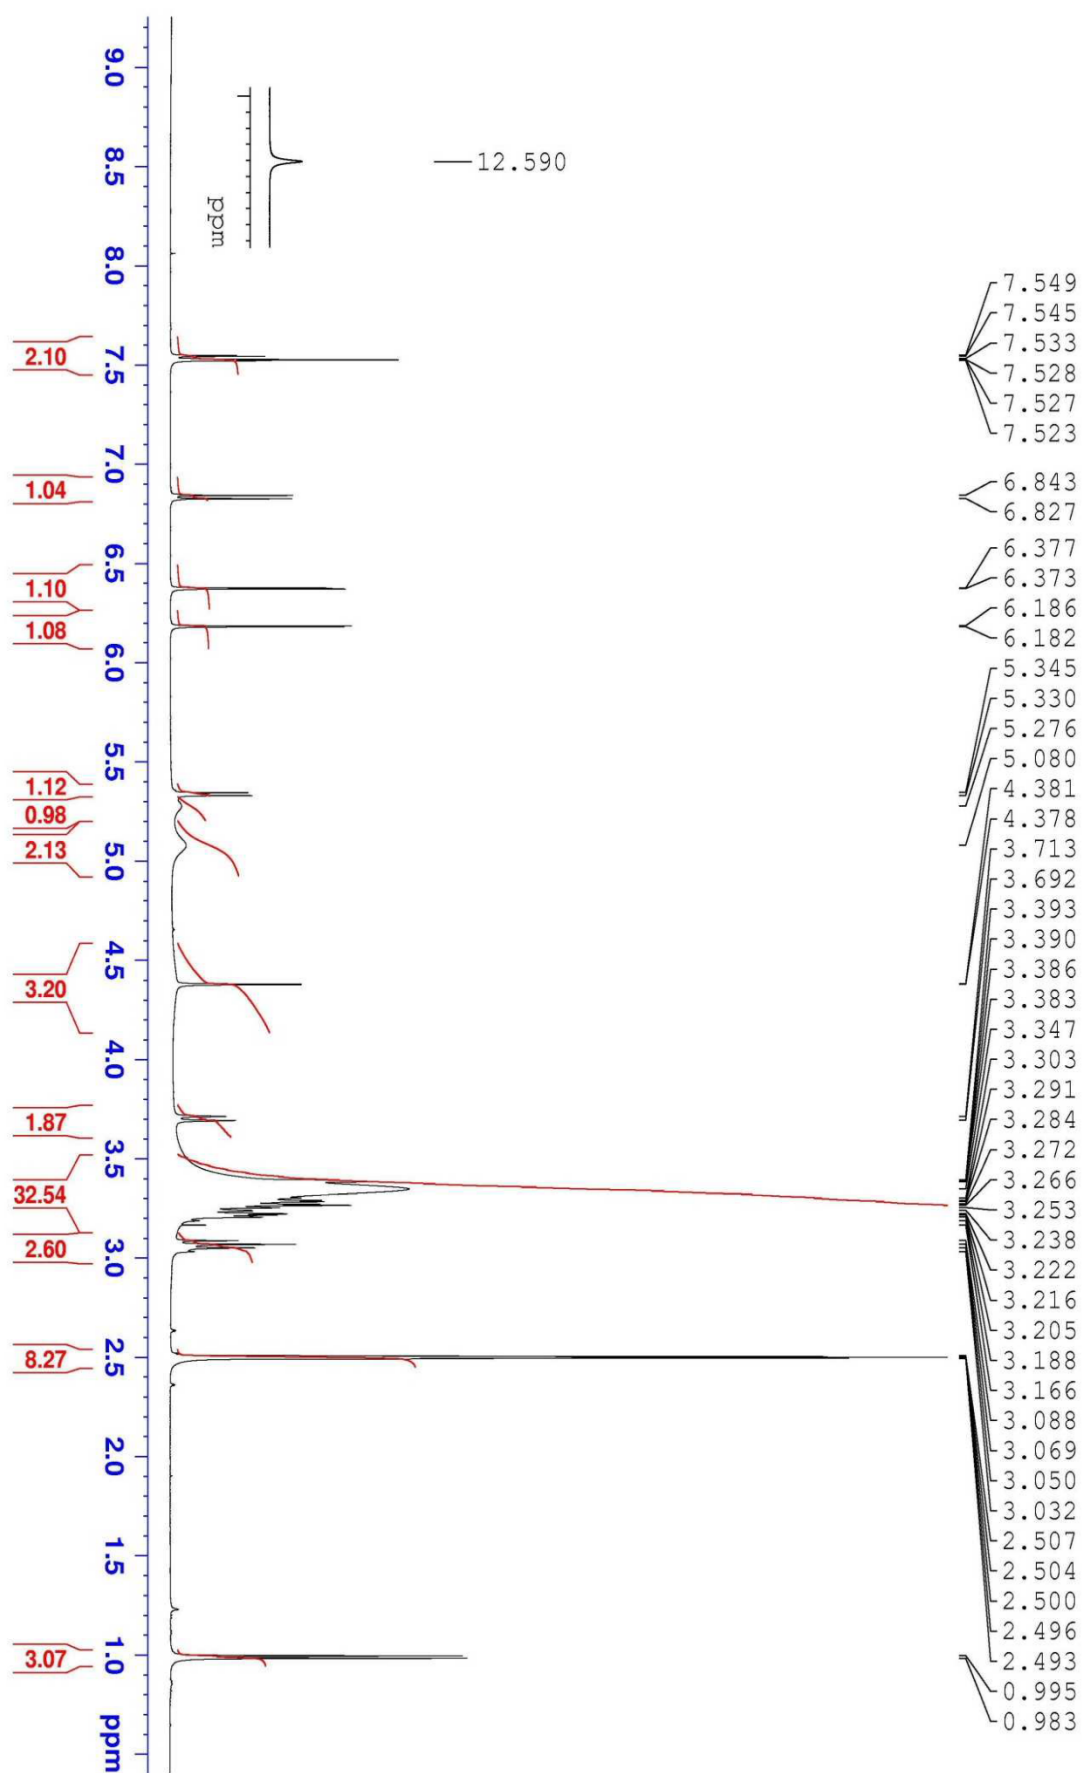

Figure S18. <sup>1</sup>H NMR spectrum of compound 7.

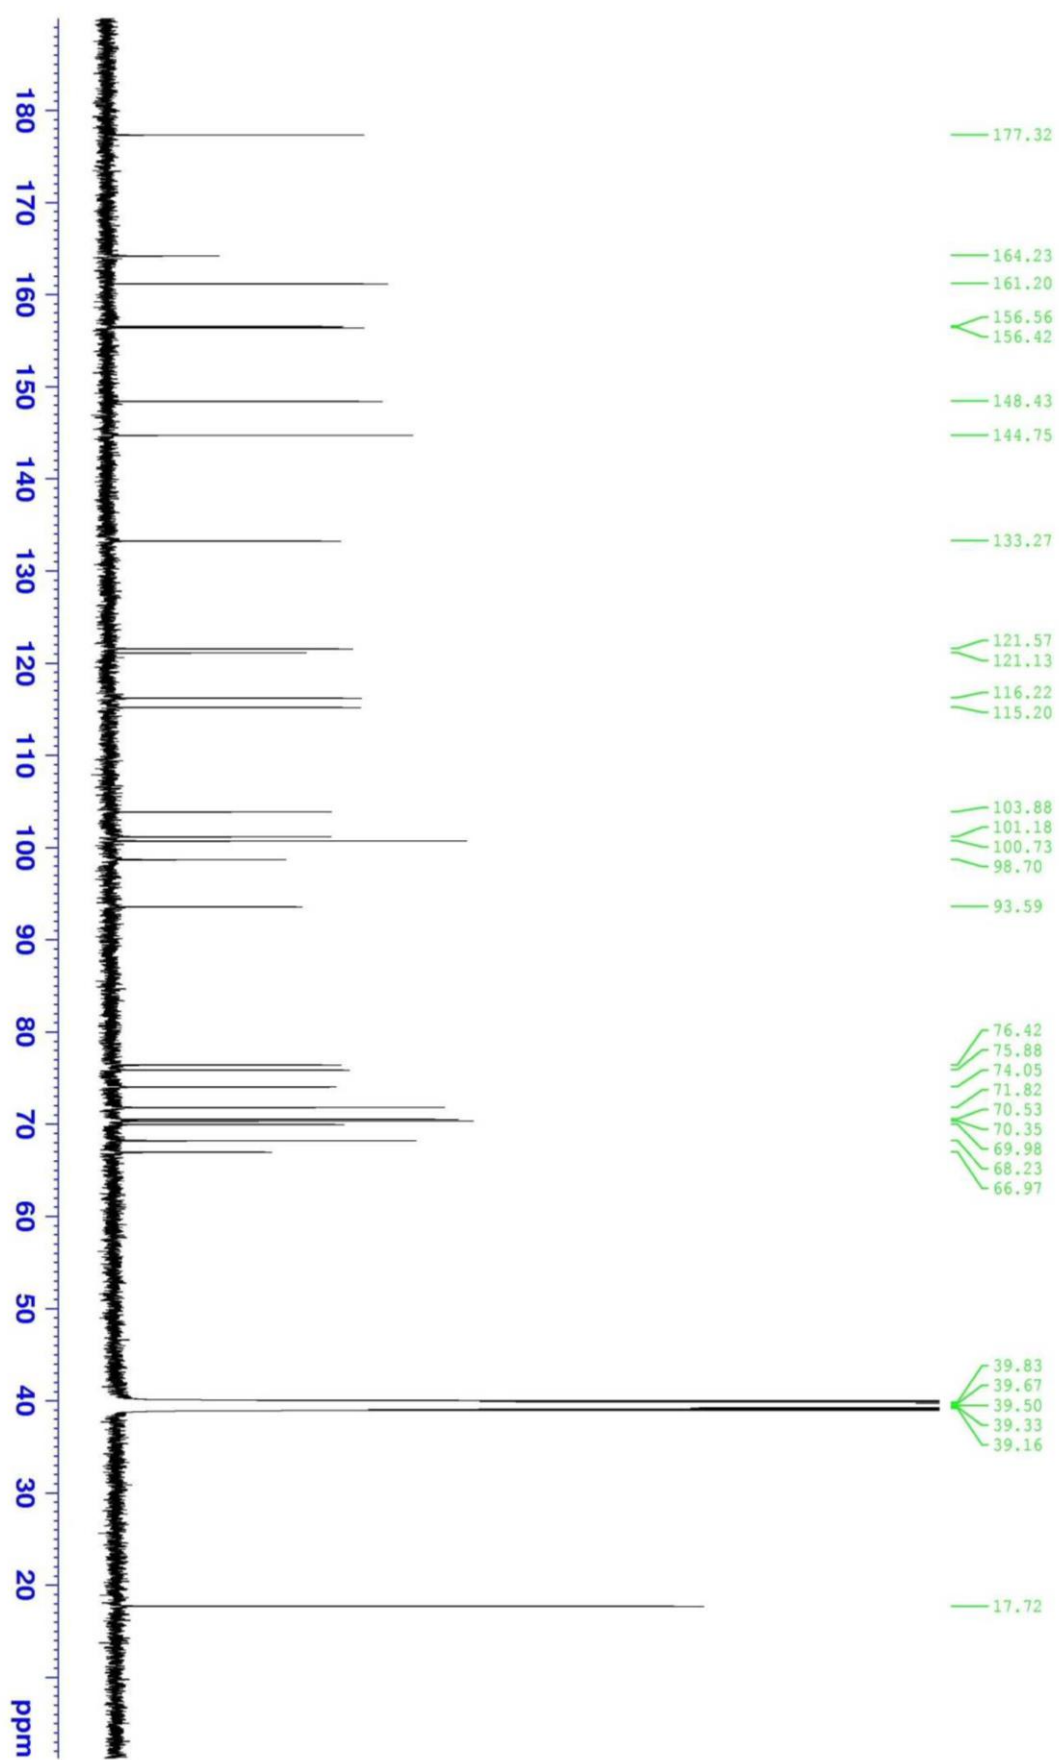

Figure S19. <sup>13</sup>C NMR spectrum of compound 7.
